# Supplementary material for: A conformally adapted all-in-one hydrogel coating: towards robust hemocompatibility and bactericidal activity
Source: Royal Society of Chemistry journal article supplement (doi:10.1039/d1tb00021g), 2021-01-01
Supplement: d1tb00021g1.pdf [file d1tb00021g1.pdf]

## Supporting Information

### **A conformally adapted all-in-one hydrogel coating: towards robust hemocompatibility and bactericidal activity**

**Authors:**

*Fanjuan Zhang<sup>a</sup>, Cheng Hu<sup>a</sup>, Li Yang<sup>a</sup>, Kunpeng Liu<sup>a</sup>, Yao Ge<sup>a</sup>, Yuan Wei<sup>a</sup>,*

*Jingyu Wang<sup>b</sup>, Rifang Luo<sup>\*,a</sup>, Yunbing Wang<sup>\*,a</sup>*

a National Engineering Research Center for Biomaterials, Sichuan University, Chengdu 610064, China

b First Affiliated Hospital of Xi'an Jiaotong University, Xi'an 710061, China

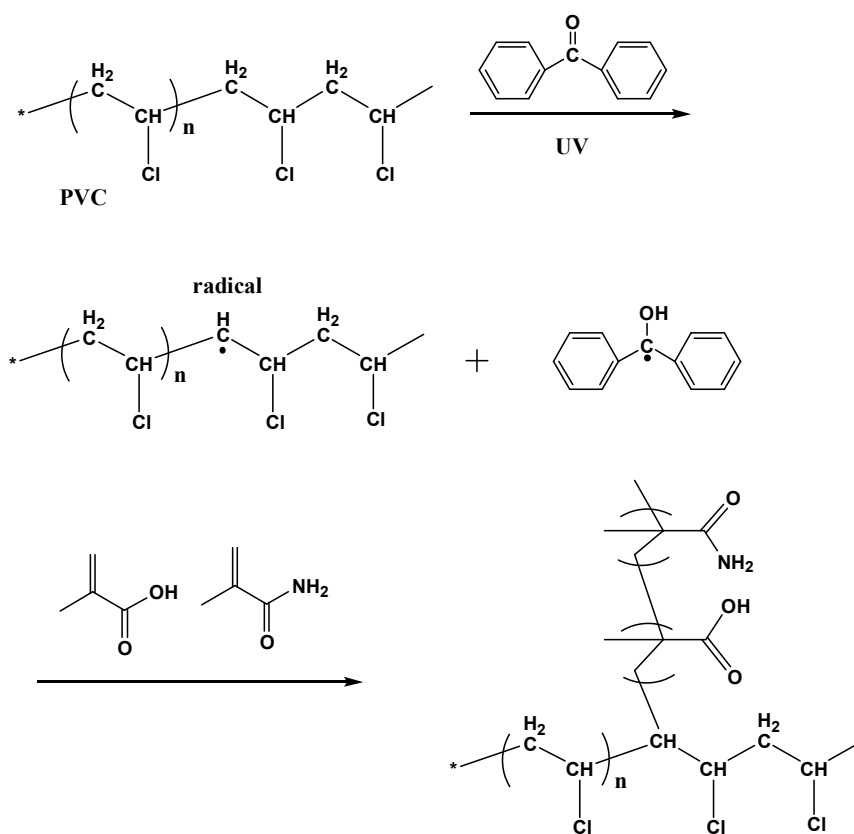

Figure S1. Schematic diagram of hydrogel coating preparation.

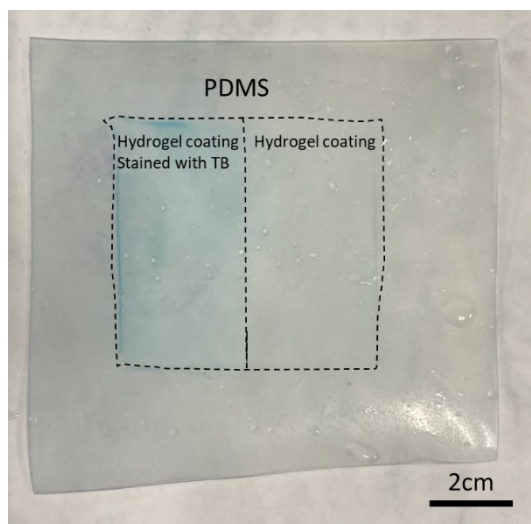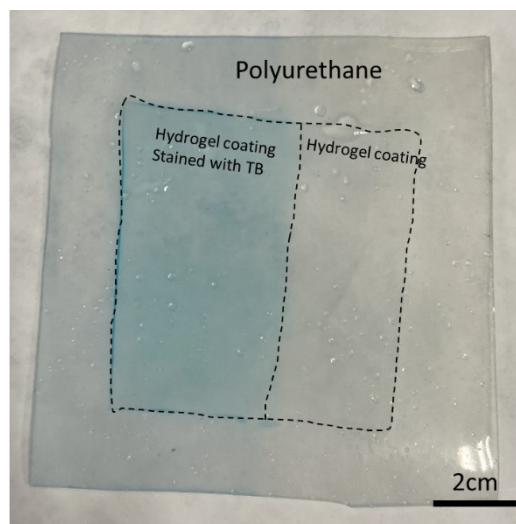

Figure S2. Hydrogel coating on different substrate, stained with toluidine blue dye.

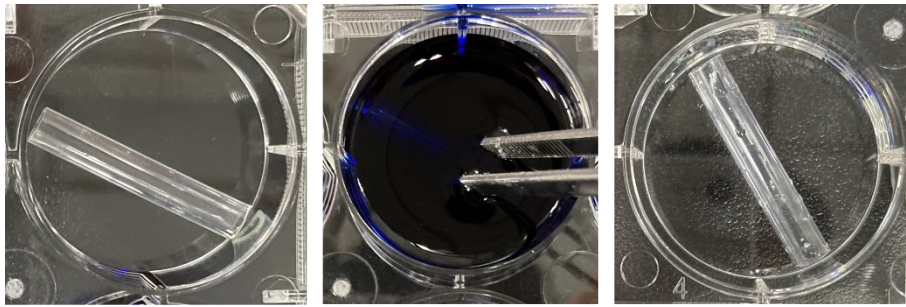

Bare PVC tube

Staining into toluidine blue  
solution for 5 minters

After washing in water

Figure S3. Uncoated bare PVC tube stained with toluidine blue dye.

---

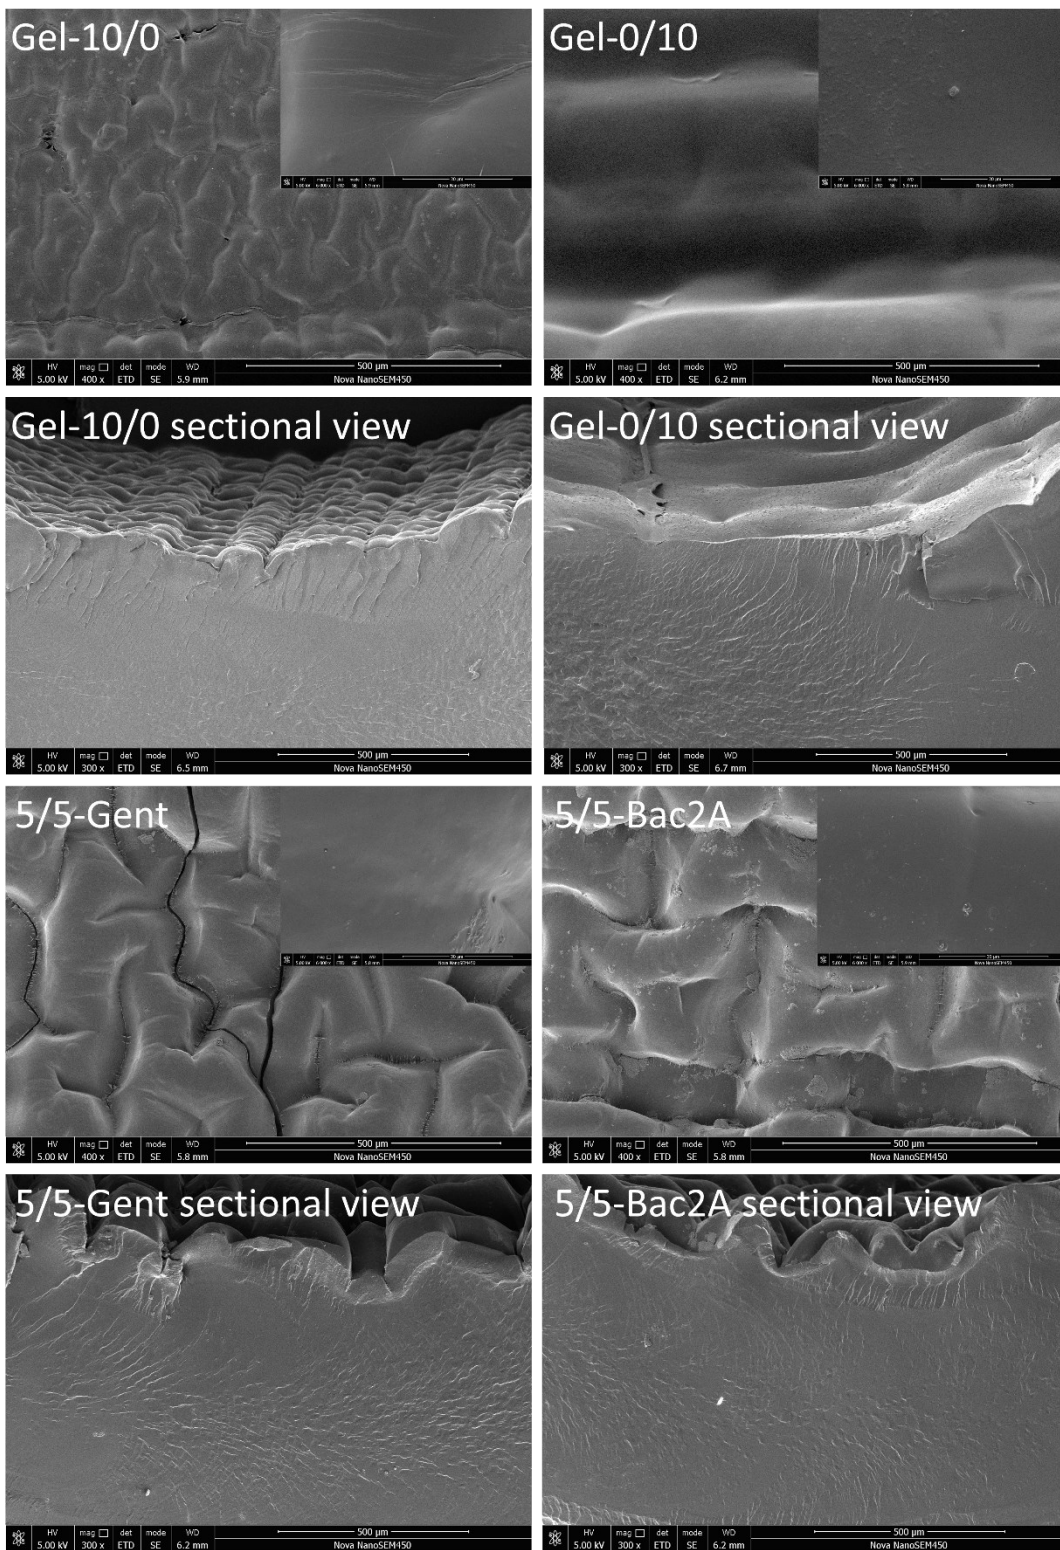

Figure S4. SEM images of the hydrogel coatings.

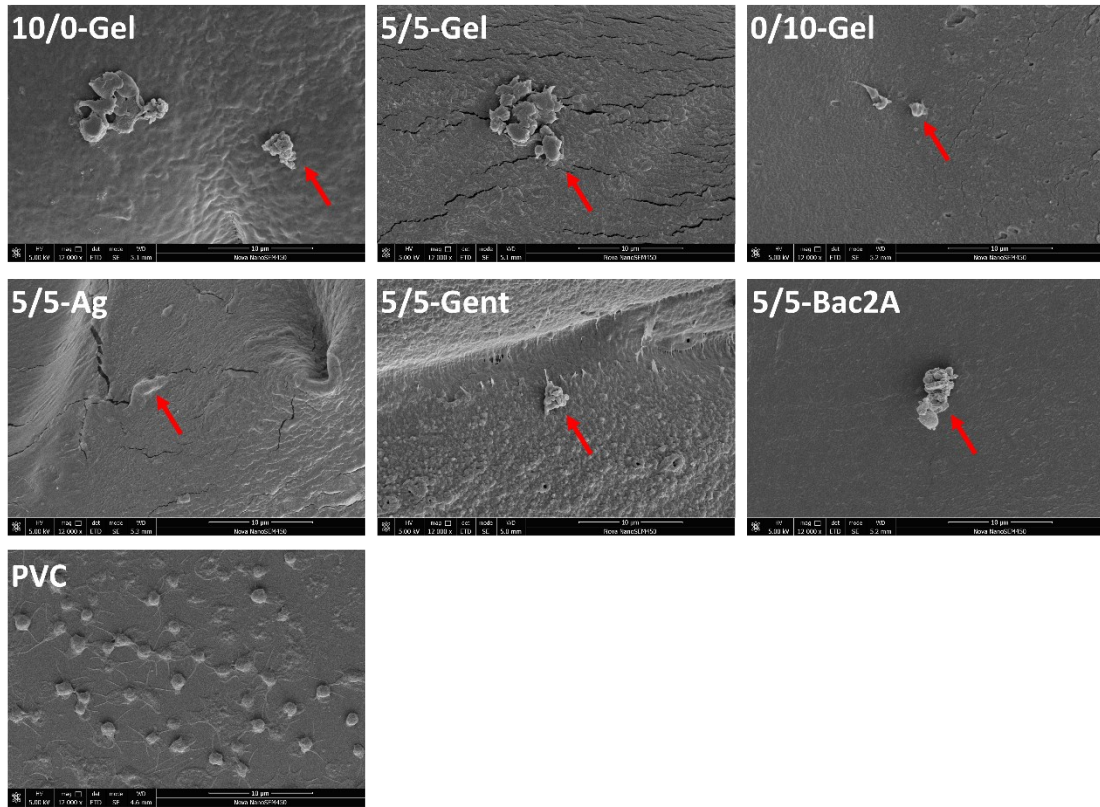

Figure S5. SEM images of adhered platelets on different sample surfaces.
